# Supplementary material for: Significant enhancement of the cycling performance and rate capability of the P/C composite via chemical bonding (P–C)
Source: Royal Society of Chemistry journal article supplement (doi:10.1039/c5ta08590j), 2015-11-13
Supplement: c5ta08590j1.pdf [file c5ta08590j1.pdf]

## Supporting Information

*Wei-jie Li,<sup>a</sup> Shu-lei Chou,<sup>a,\*</sup> Jia-zhao Wang,<sup>a</sup> Hua-kun Liu<sup>a</sup>*

<sup>a</sup>Institute for Superconducting and Electronic Materials,  
University of Wollongong,  
2522, Wollongong, Australia.  
\*E-mail: [shulei@uow.edu.au](mailto:shulei@uow.edu.au)

**Figure S1.** SEM images of (a) graphite and (b) red phosphorus.

**Figure S2.** XRD pattern of the P/GnPs -300.

**Figure S3.** (a) SEM image with corresponding EDS mapping, and (b) TEM image of P/GnPs -300.

**Figure S4.** XPS spectra of (a) C1s and (b) P 2p of P/GnPs-300.

**Figure S5.** Raman spectra of P/GnPs composites milled at different speeds.

**Figure S6.** FTIR spectra of P/GnPs composites milled at different speeds.

**Figure S7.** Electrochemical impedance spectra of P/GnPs – 500 (b) compared with P/GnPs - 300 (c) in the charged state at 0.6 V in the 5<sup>th</sup>, 20<sup>th</sup>, and 100<sup>th</sup> cycles. (a) Equivalent circuit used to interpret the results.

**Figure S8.** Cycling performance of the P/GnPs -500 composite electrode at the high current densities of 500 mA g<sup>-1</sup> and 1 A g<sup>-1</sup>.

**Figure S9.** (a) Charge-discharge curves for selected cycles, and (b) cycling performance of the graphite milled for 40 h.

**Figure S10.** Photographs of the electrodes after 200 cycles: (a) P/GnPs-300; (b) P/GnPs -500.

**Table S1.**  $R_{ct}$  ( $\Omega$ ) and  $R_x$  ( $\Omega$ ) of the P/GnPs electrodes after different cycles.

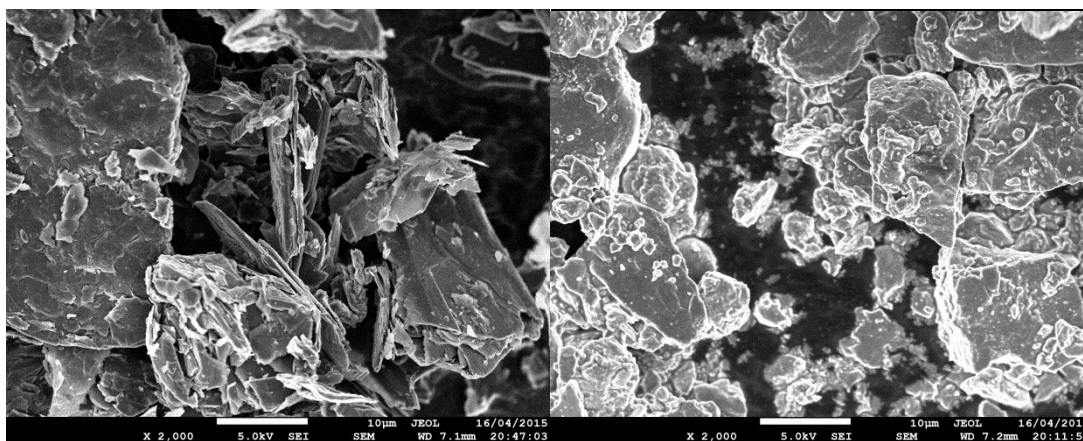

Figure S1. SEM images of (a) graphite and (b) red phosphorus.

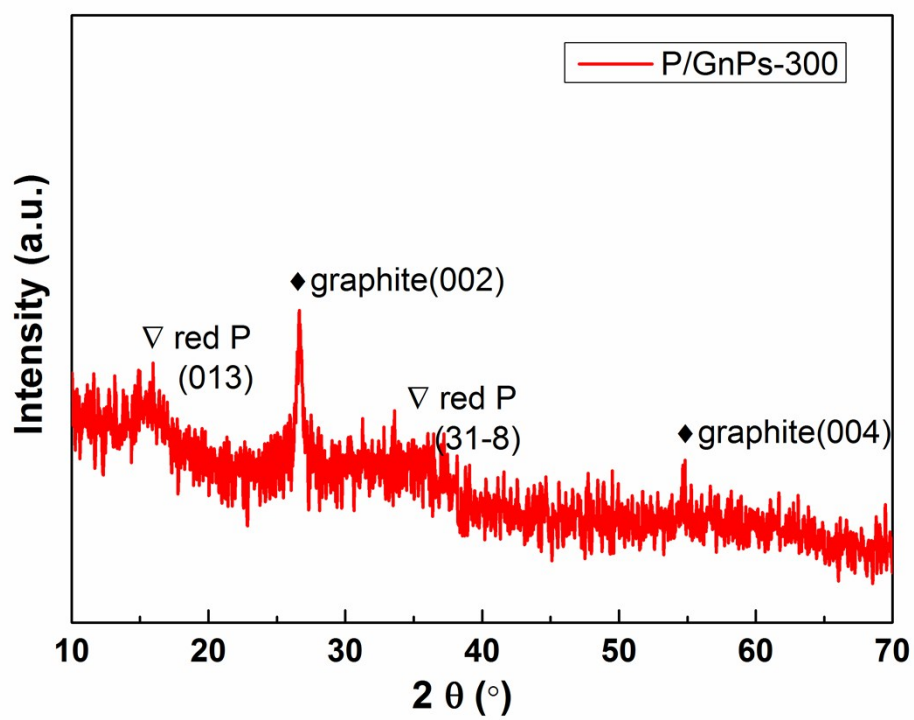

Figure S2. XRD pattern of the P/GnPs -300.

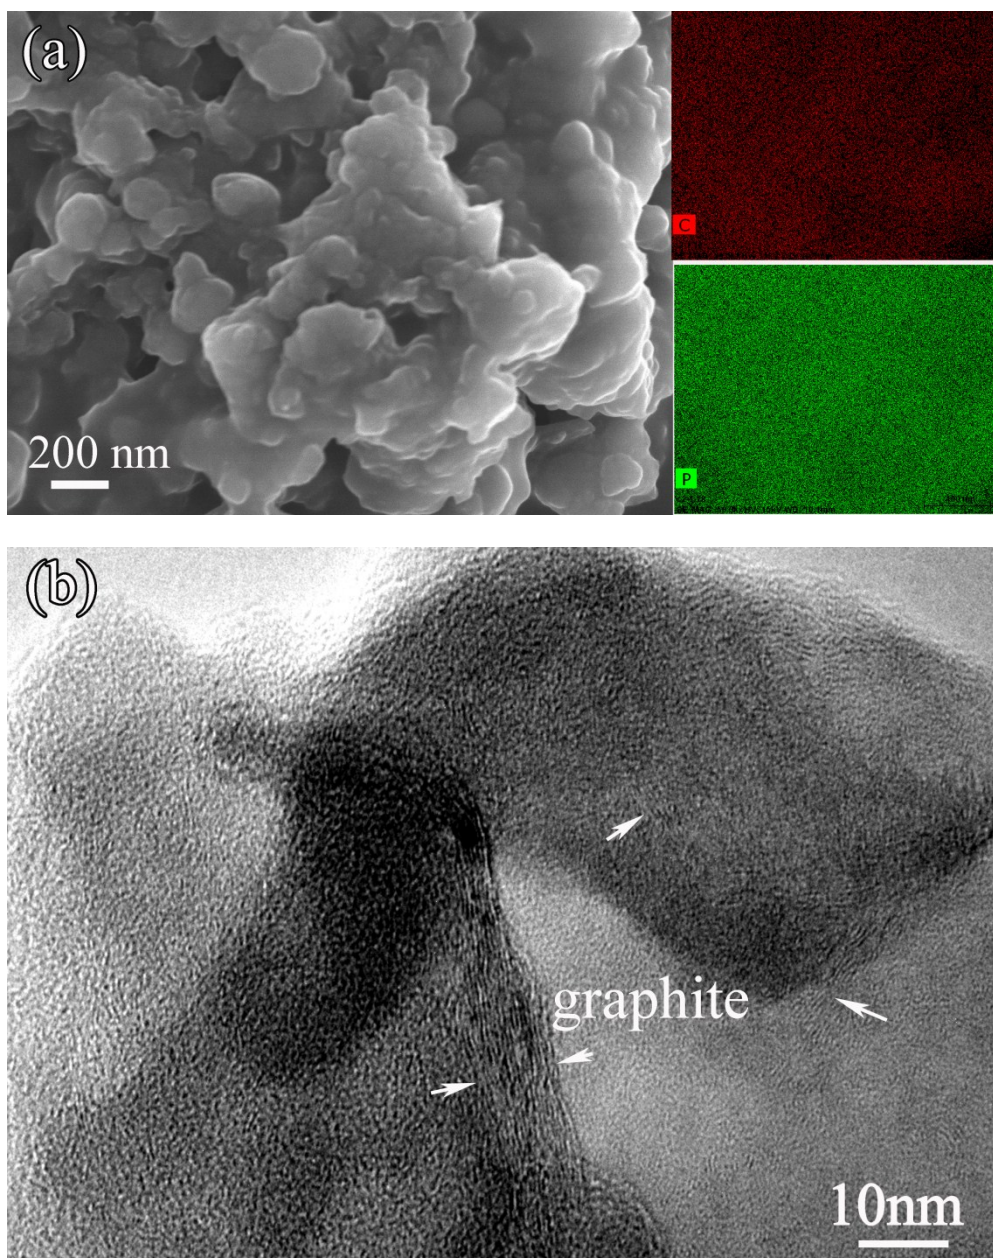

**Figure S3.** (a) SEM image with corresponding EDS mapping, and (b) TEM image of P/GnPs

-300.

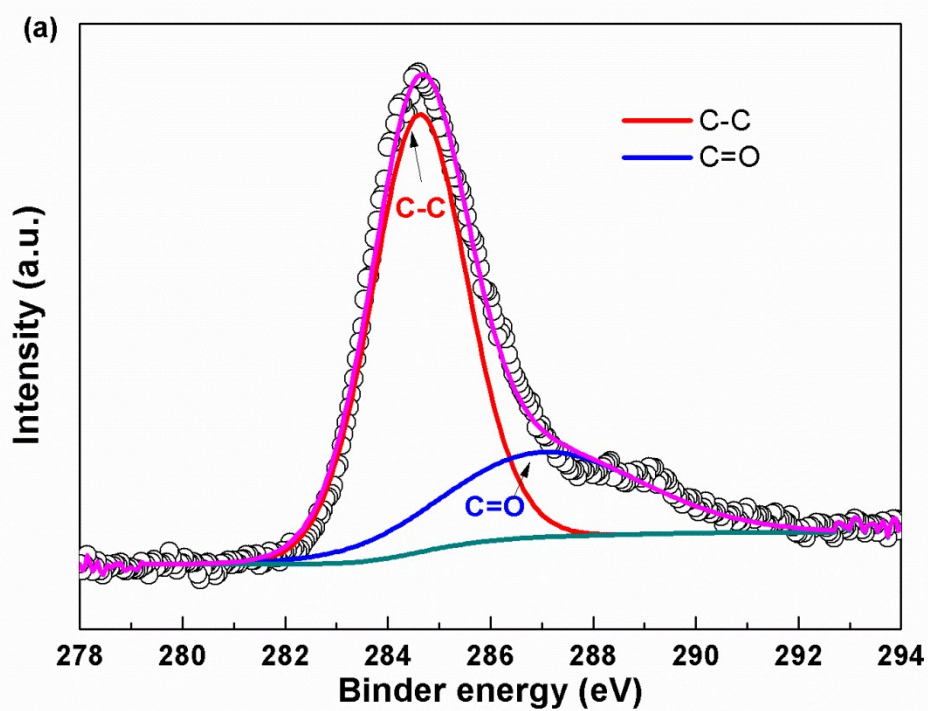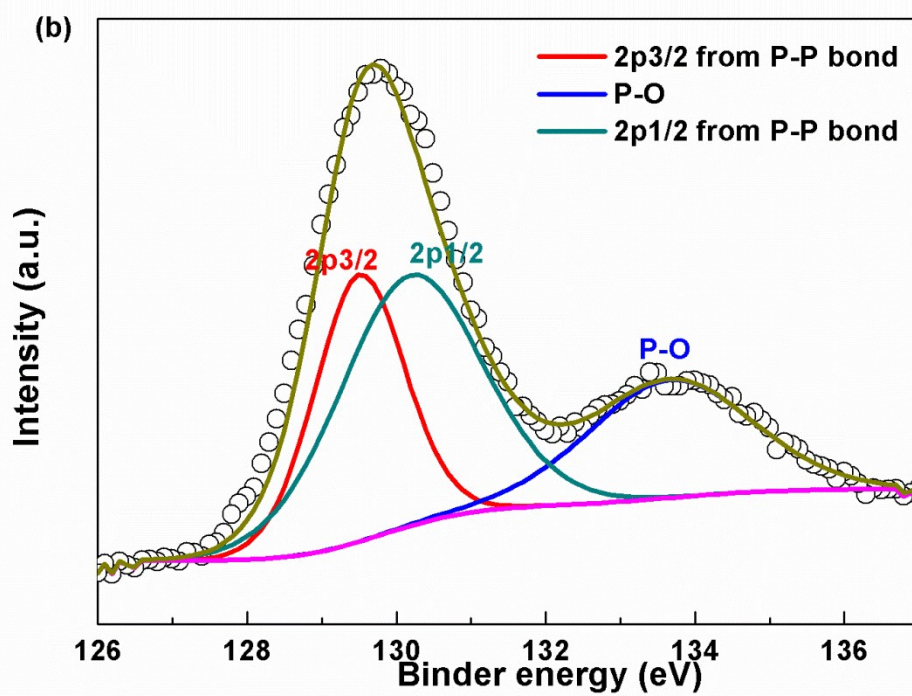

Figure S4. XPS spectra of (a) C1s and (b) P 2p of P/GnPs-300.

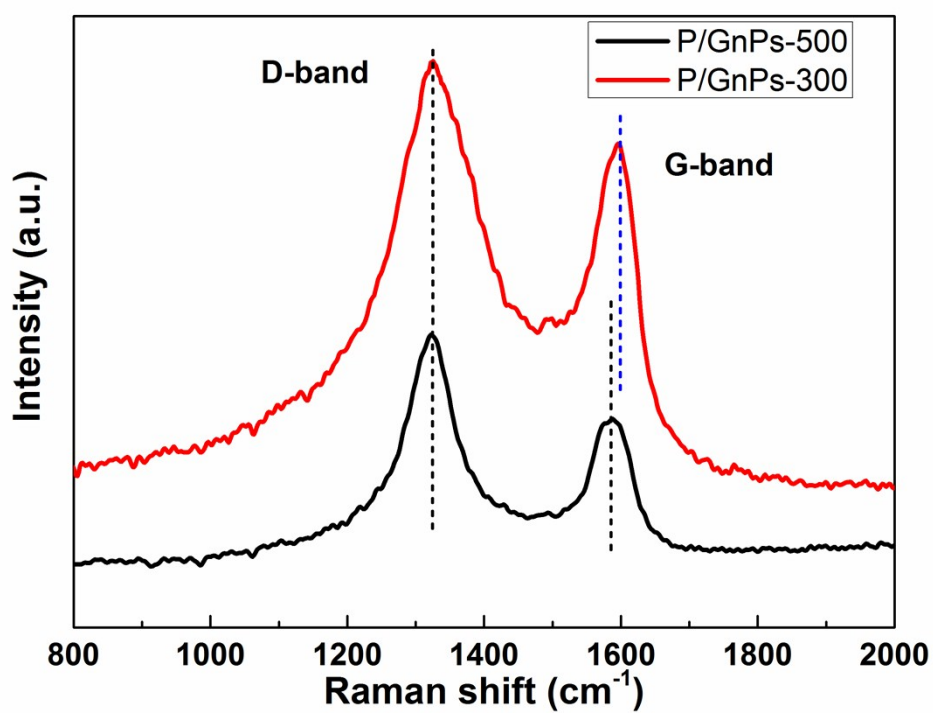

Figure S5. Raman spectra of P/GnP composites milled at different speed

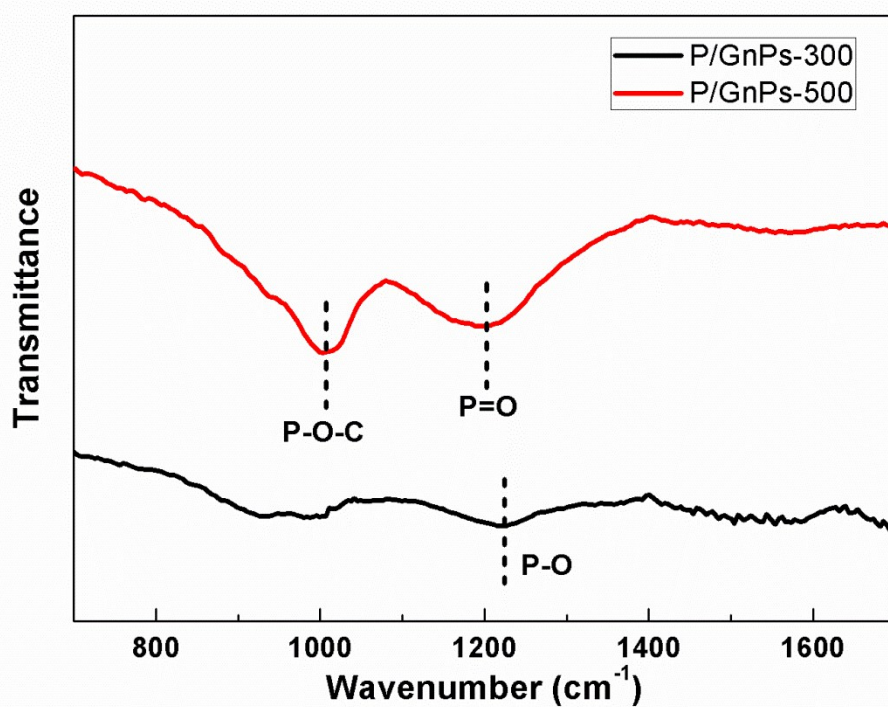

Figure S6. FTIR spectra of P/GnP composites milled at different speeds.

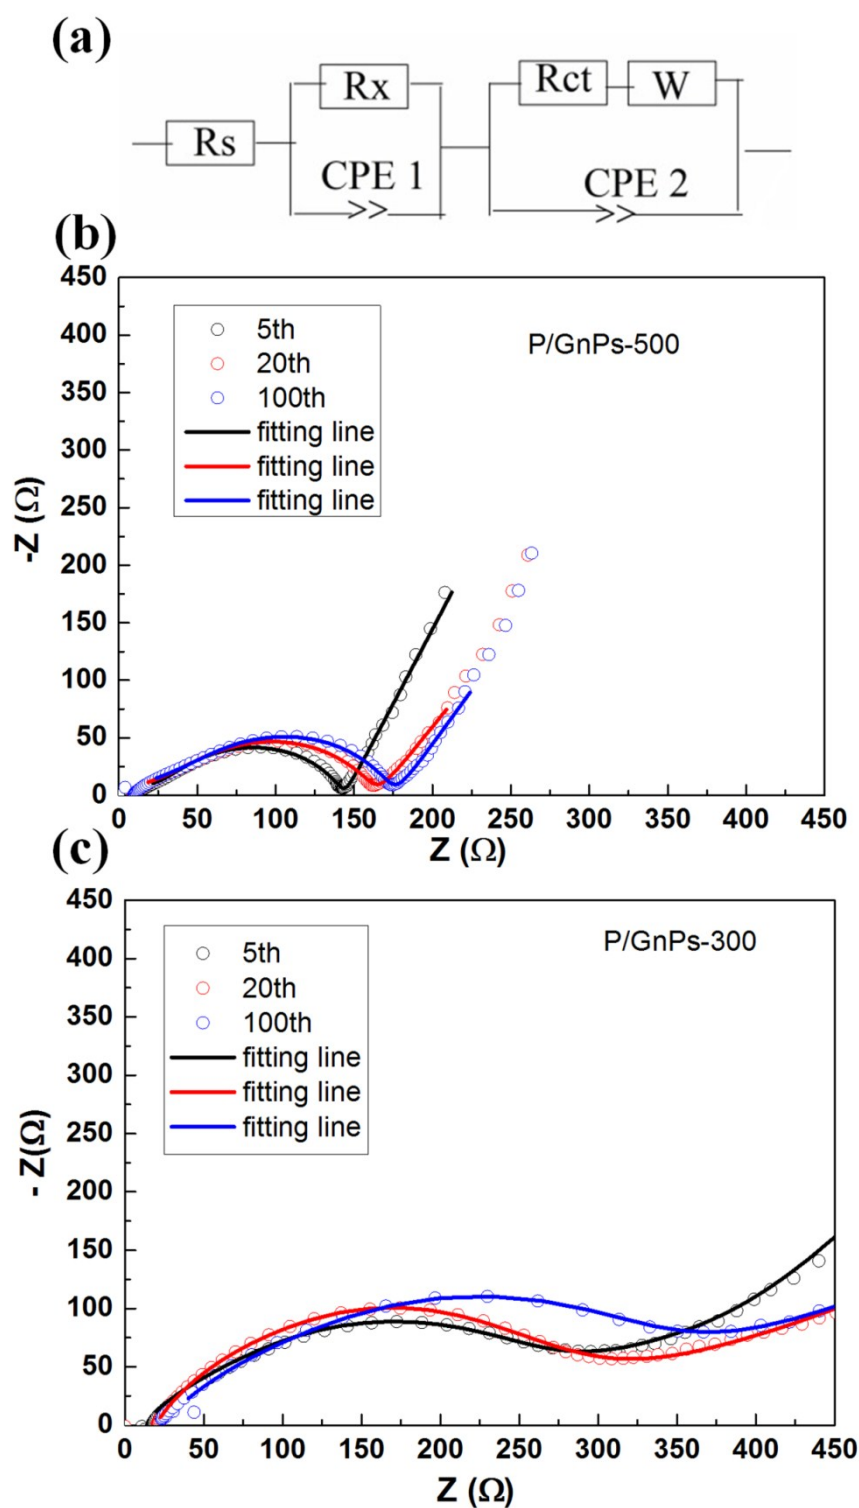

**Figure S7.** Electrochemical impedance spectra of P/GnPs – 500 (b) compared with P/GnPs - 300 (c) in the charged state at 0.6 V in the 5<sup>th</sup>, 20<sup>th</sup>, and 100<sup>th</sup> cycles. (a) Equivalent circuit used to interpret the results.

**Table S1.**  $R_{ct}$  ( $\Omega$ ) and  $R_x$  ( $\Omega$ ) of the P/GnPs electrodes after different cycles.

|             | 5 <sup>th</sup> cycle |          | 20 <sup>th</sup> cycle |          | 100 <sup>th</sup> cycle |          |
|-------------|-----------------------|----------|------------------------|----------|-------------------------|----------|
|             | $R_x$                 | $R_{ct}$ | $R_x$                  | $R_{ct}$ | $R_x$                   | $R_{ct}$ |
| P/GnPs -500 | 49                    | 95       | 70                     | 96       | 79                      | 106      |
| P/GnPs -300 | 32                    | 147      | 64                     | 168      | 139                     | 277      |

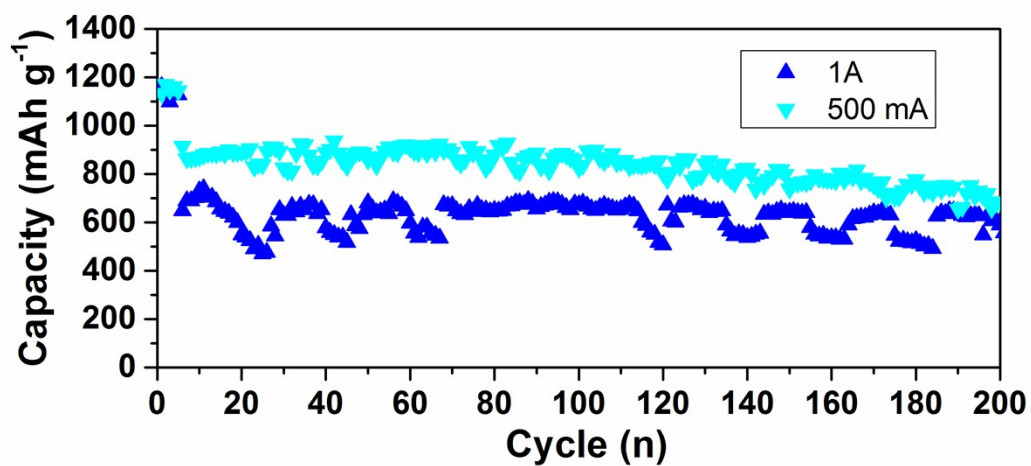

**Figure S8.** Cycling performance of the P/GnPs -500 composite electrode at the high current densities of 500  $\text{mA g}^{-1}$  and 1  $\text{A g}^{-1}$  (the current density is 100  $\text{mA g}^{-1}$  in the first 5 cycles).

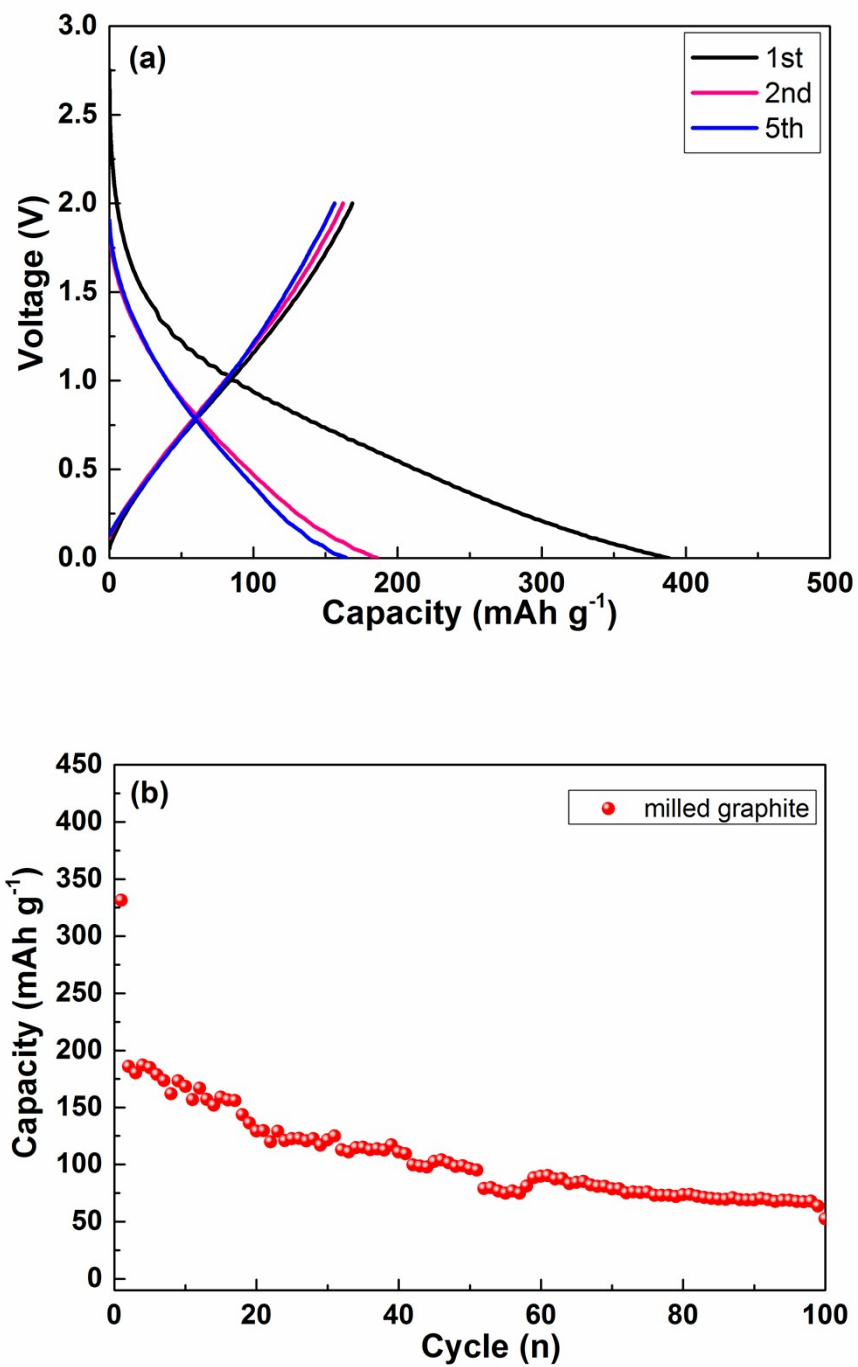

**Figure S9.** (a) Charge-discharge curves for selected cycles, and (b) cycling performance of the graphite milled for 40 h.



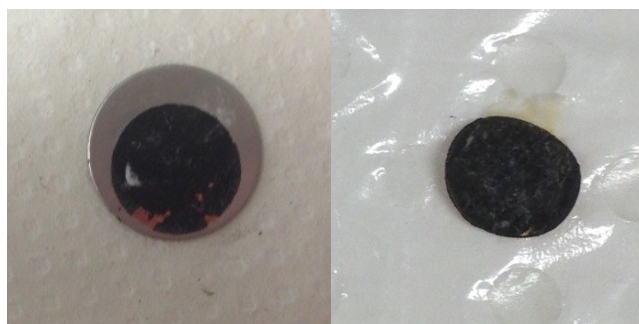

**Figure S10.** Photographs of the electrodes after 200 cycles: (a) P/GnPs-300; (b) P/GnPs -500.
